# Supplementary material for: Genome-Wide Association Study of Blood Mercury in European Pregnant Women and Children
Source: MDPI journal article supplement (doi:10.3390/genes14122123), 2023-11-24
Supplement: s1 [file s1]

# Supplementary materials: Genome-wide association study of blood mercury in European pregnant women and children

**Supplementary Table S1.** Summary of study population, measurement methods, and GWAS characteristics.

|                                | <b>ALSPAC</b>                  | <b>HELIX</b>                                     |
|--------------------------------|--------------------------------|--------------------------------------------------|
| Date of recruitment            | April 1991 - December 1992     | 1999 - 2010                                      |
| Population                     | Pregnant women                 | Children aged 7 to 9                             |
| Location                       | Avon Health Authority area, UK | UK, France, Spain, Lithuania, Norway, and Greece |
| N recruited                    | 14,833                         | Approximately 32,000                             |
| Mercury sample source          | Whole blood                    | Whole blood                                      |
| Mercury sample timing          | Early pregnancy                | 6 - 11 years old                                 |
| Mercury sample analysis method | ICP-DRC-MS                     | ICP-SFMS                                         |
| N with mercury sample          | 4,131                          | 1,301                                            |
| <b>Genotyping</b>              |                                |                                                  |
| N with blood DNA sample        | 10,015                         | 1,397                                            |
| Genotyping method              | Illumina Human660W-Quad Array  | Infinium Global Screening Array (GSA) (Illumina) |
| N SNP directly genotyped       | 557,124                        | 692,367                                          |
| QC software                    | Plink v1.07                    | Plink v1                                         |
| Individual missingness         | >5%                            | >3%                                              |
| SNP missingness                | >5%                            | >5%                                              |
| Hardy-Weinberg equilibrium     | $P < 1.0 \times 10^{-07}$      | $P < 1.0 \times 10^{-06}$                        |
| Minor allele frequency         | <1%                            | <1%                                              |
| Cryptic relatedness            | IBD > 0.125                    | IBD > 0.125                                      |

|                              |                                                                                                  |                                                                 |
|------------------------------|--------------------------------------------------------------------------------------------------|-----------------------------------------------------------------|
| Other exclusions             | indeterminate X chromosome heterozygosity, extreme autosomal heterozygosity, population outliers | Gender mismatch, heterozygosity, relatedness, non-canonical PAR |
| N samples post QC            | 8,196                                                                                            | 1,304                                                           |
| N SNP post QC                | 526,688                                                                                          | 509,344                                                         |
| <b>Imputation</b>            |                                                                                                  |                                                                 |
| Reference panel              | Haplotype Reference Consortium (HRC r1.1)                                                        | Haplotype Reference Consortium (HRC r1.1)                       |
| Phasing                      | ShapeIt v2                                                                                       | Eagle v2.4                                                      |
| Imputation                   | Impute V3                                                                                        | minimac4                                                        |
| N SNP after imputation       | 39,117,141                                                                                       | 40,405,505                                                      |
| Minor allele frequency       | <1%                                                                                              | <1%                                                             |
| Imputation quality (INFO)    | <0.9                                                                                             | <0.9                                                            |
| Hardy-Weinberg equilibrium   | $P < 1.0 \times 10^{-07}$                                                                        | $P < 1.0 \times 10^{-06}$                                       |
| N SNP post QC                | 6,649,782                                                                                        | 6,143,757                                                       |
| <b>GWAS</b>                  |                                                                                                  |                                                                 |
| N samples mercury + genotype | 2,893                                                                                            | 1,042                                                           |
| GWAS software                | SNPTEST 2.5.2                                                                                    | Plink v1                                                        |
| Covariates                   | Age + 10 PCA                                                                                     | Age + 10 PCA                                                    |
| Minor allele frequency       | <1%                                                                                              | <1%                                                             |
| Other exclusions             | Unidentifiable rsid                                                                              | Unidentifiable rsid                                             |

**Supplementary Table S2.** Previously identified variants.

Variants identified in gene-association studies of mercury or genome-wide association studies of metals that interact with mercury within the body (lead, selenium, zinc).

| SNP        | Gene        | Biological sample    | Population                                 | Effect allele | Other allele | Beta (p-value) | PMID     |
|------------|-------------|----------------------|--------------------------------------------|---------------|--------------|----------------|----------|
| rs41307970 | <i>GCLM</i> | Whole blood & plasma | 88 adults in Amazon riverside communities. | CT + TT       | CC           | -0.21 (0.05)   | 24696865 |

|            |              |              |                                                                    |                      |                     |                                   |             |
|------------|--------------|--------------|--------------------------------------------------------------------|----------------------|---------------------|-----------------------------------|-------------|
| rs2270837  | <i>MTIM</i>  | Urine        | 515 dental professionals                                           | A                    | G                   | 1.85 (0.008)                      | 22233731    |
| rs10636    | <i>MT2A</i>  | Urine        | 515 dental professionals                                           | C                    | G                   | 0.06 (-)                          | 22233731    |
| rs8052394  | <i>MT1A</i>  | Hair         | 515 dental professionals                                           | A * intake           | G                   | -300 (0.02)                       | 22233731    |
| rs9936741  | <i>MTIM</i>  | Hair         | 515 dental professionals                                           | T * intake           | C                   | 19.3 (0.02)                       | 22233731    |
| rs761142   | <i>GCLC</i>  | Hair         | 1,449 mothers in Seychellois population                            | GG                   | TT                  | -0.46 (0.02)                      | 29573653    |
| rs3811647  | <i>TF</i>    | Cord tissue  | 1,311 cord samples                                                 | A                    | G                   | - (0.03)                          | 23903878    |
| <b>SNP</b> | <b>Gene</b>  | <b>Metal</b> | <b>Population</b>                                                  | <b>Effect allele</b> | <b>Other allele</b> | <b>Beta (p-value)</b>             | <b>PMID</b> |
| rs1805313  | <i>ALAD</i>  | Lead         | 5,433 Australian and UK adults.                                    | A                    | G                   | + (3.91 × 10 <sup>-14</sup> )     | 25820613    |
| rs672413   | <i>ARSB</i>  | Selenium     | 9,639 subjects from meta-analysis of US, Australian, and UK adults | A                    | G                   | + (5.21 × 10 <sup>-14</sup> )     | 25343990    |
| rs705415   | -            | Selenium     | 8,054 subjects from meta-analysis of US, Australian, and UK adults | T                    | C                   | - (4.64 × 10 <sup>-10</sup> )     | 25343990    |
| rs6586282  | <i>CBS</i>   | Selenium     | 9,639 subjects from meta-analysis of US, Australian, and UK adults | T                    | C                   | - (3.96 × 10 <sup>-09</sup> )     | 25343990    |
| rs1532423  | <i>CAI</i>   | Zinc         | 2,603 adults Australia                                             | A                    | G                   | 0.18 (6.40 × 10 <sup>-12</sup> )  | 23720494    |
| rs2120019  | <i>PPCDC</i> | Zinc         | 2,603 adults Australia                                             | C                    | T                   | -0.29 (1.40 × 10 <sup>-12</sup> ) | 23720494    |

### Supplementary Figure S1. Hg distributions.

Blood Hg concentrations in (a) 2,893 pregnant women (b) 1,042 children aged 6-11 years old.

Includes 7 samples with Hg > 8 µg/L which were removed from Figure 1 for readability.

(a)

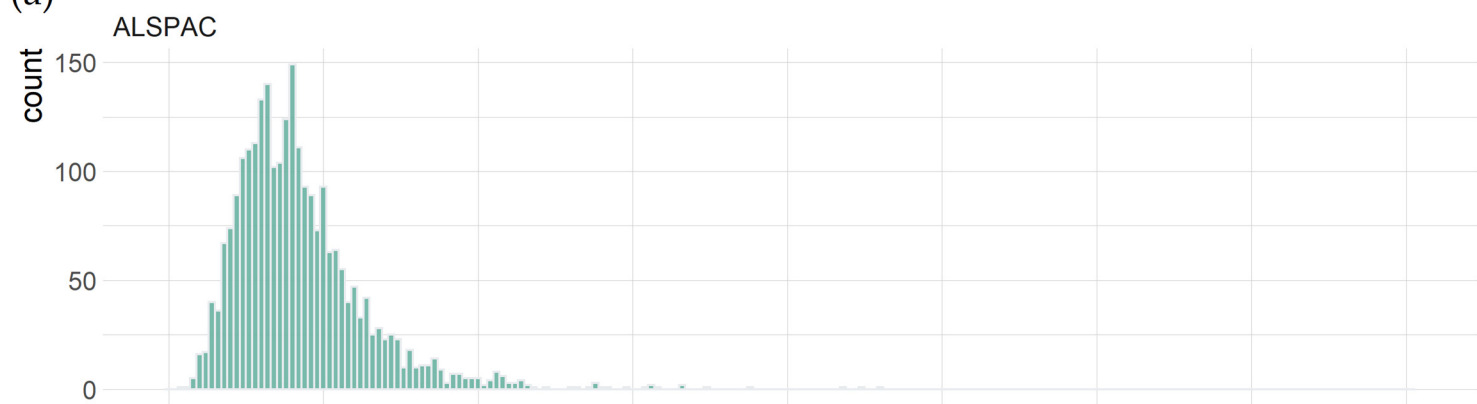

(b)

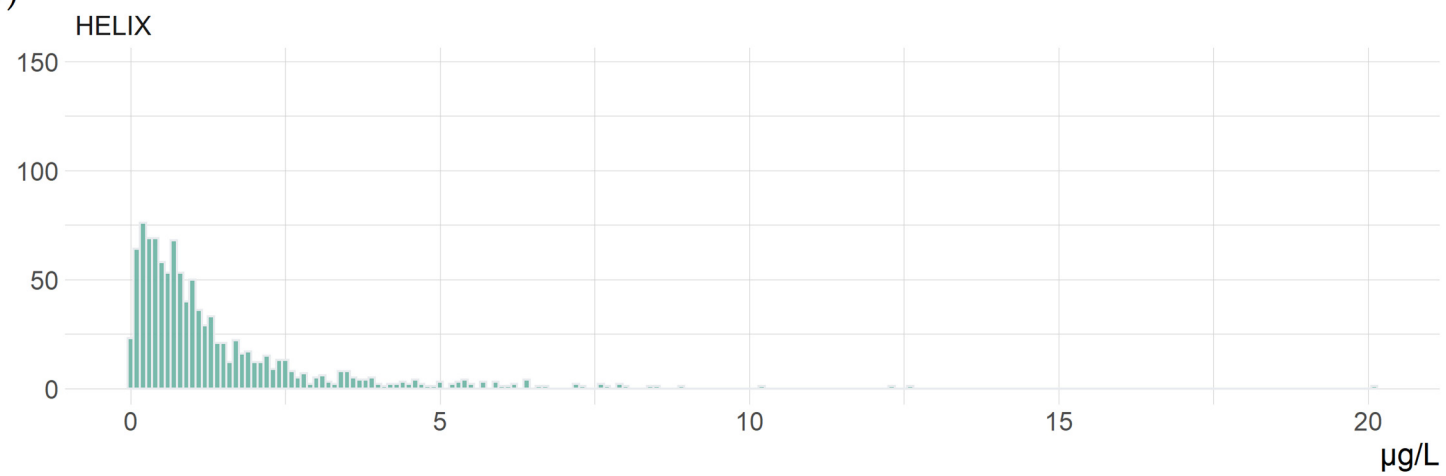

Supplementary Figure S2. GWAS Manhattan plots.

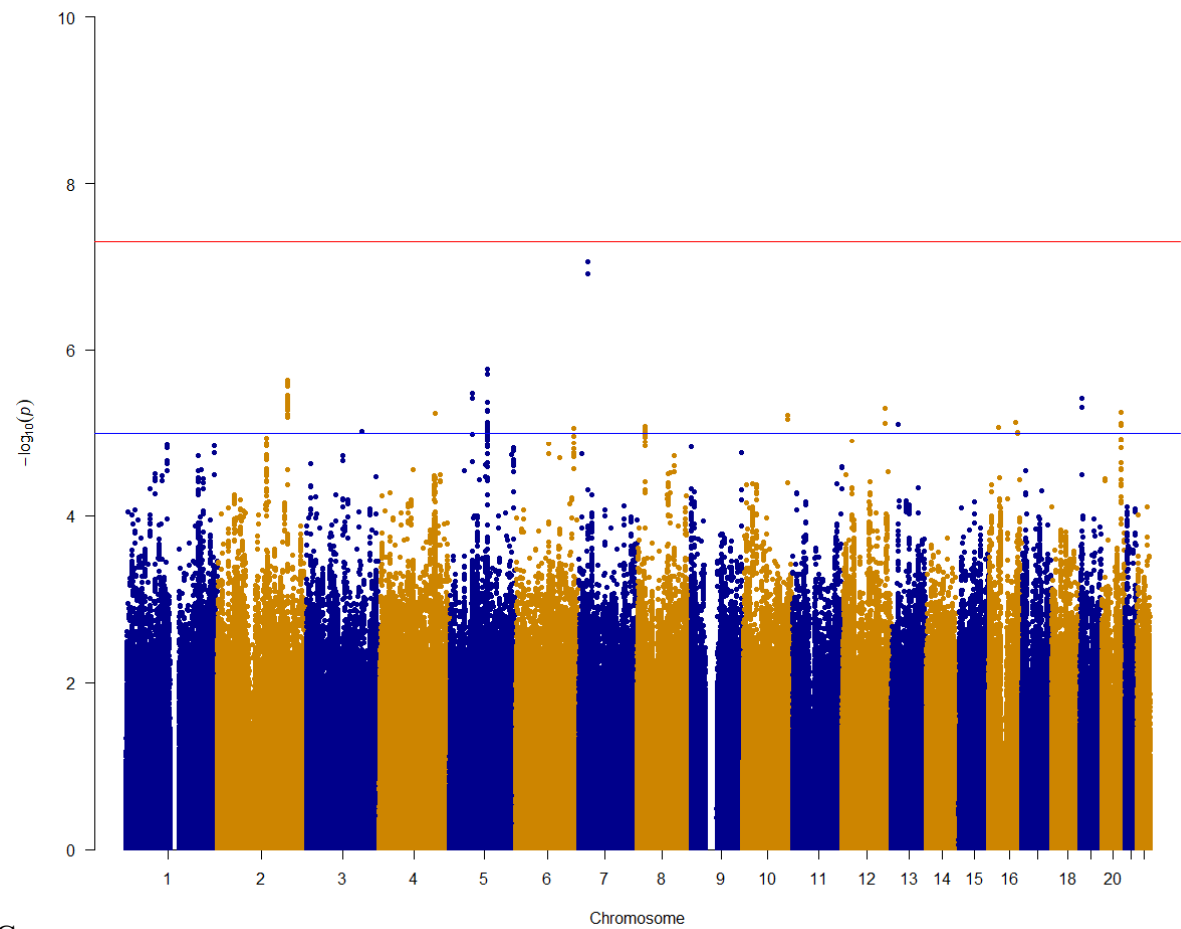

(a) ALSPAC

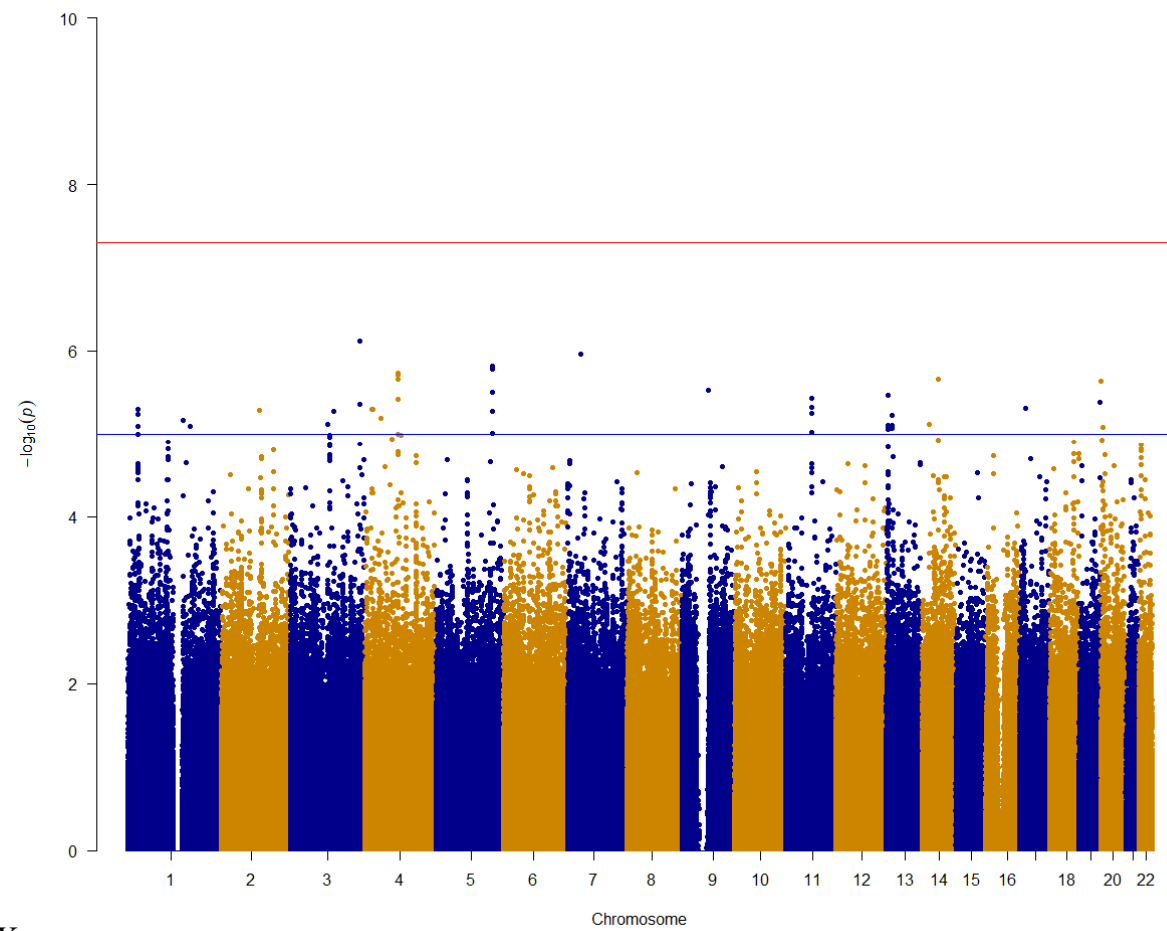

(b) HELIX

### Supplementary Figure S3. QQ plots.

Expected and observed p-values

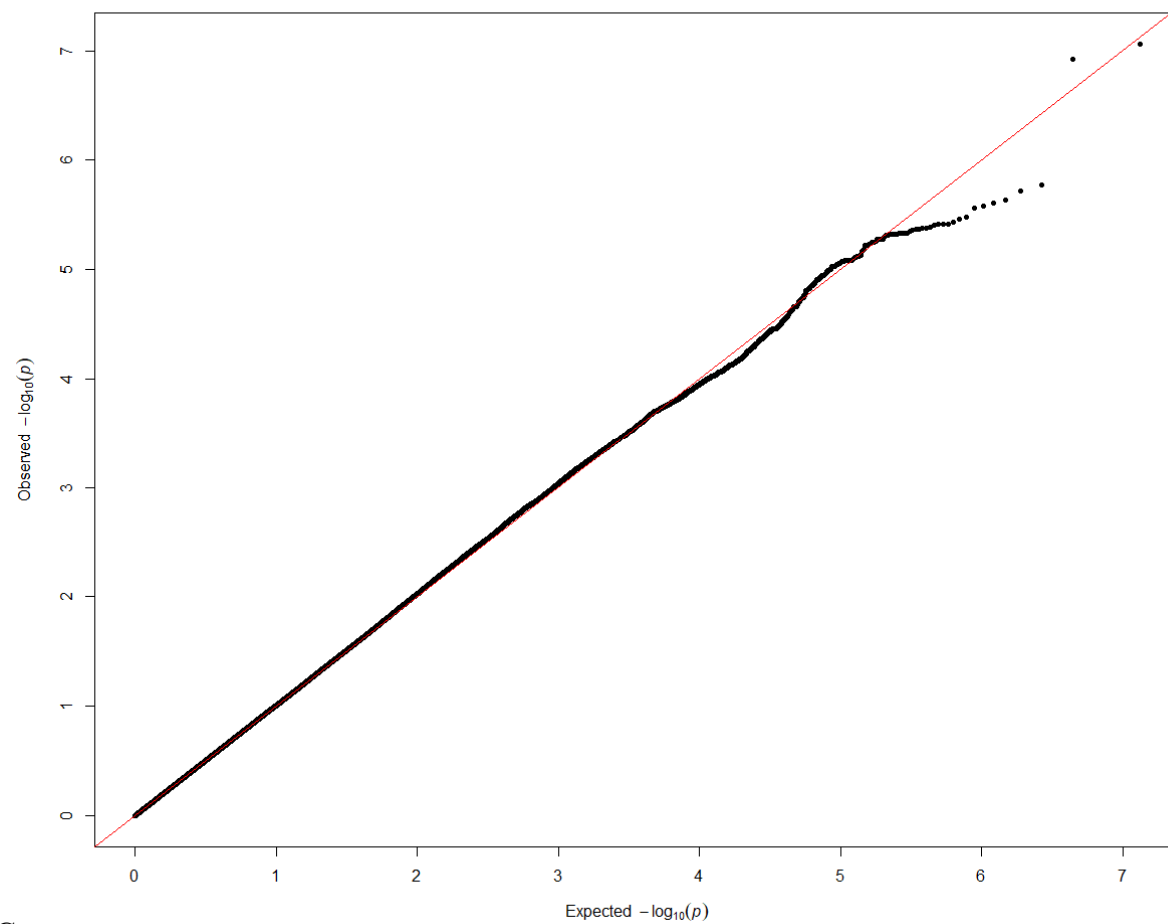

(a) ALSPAC

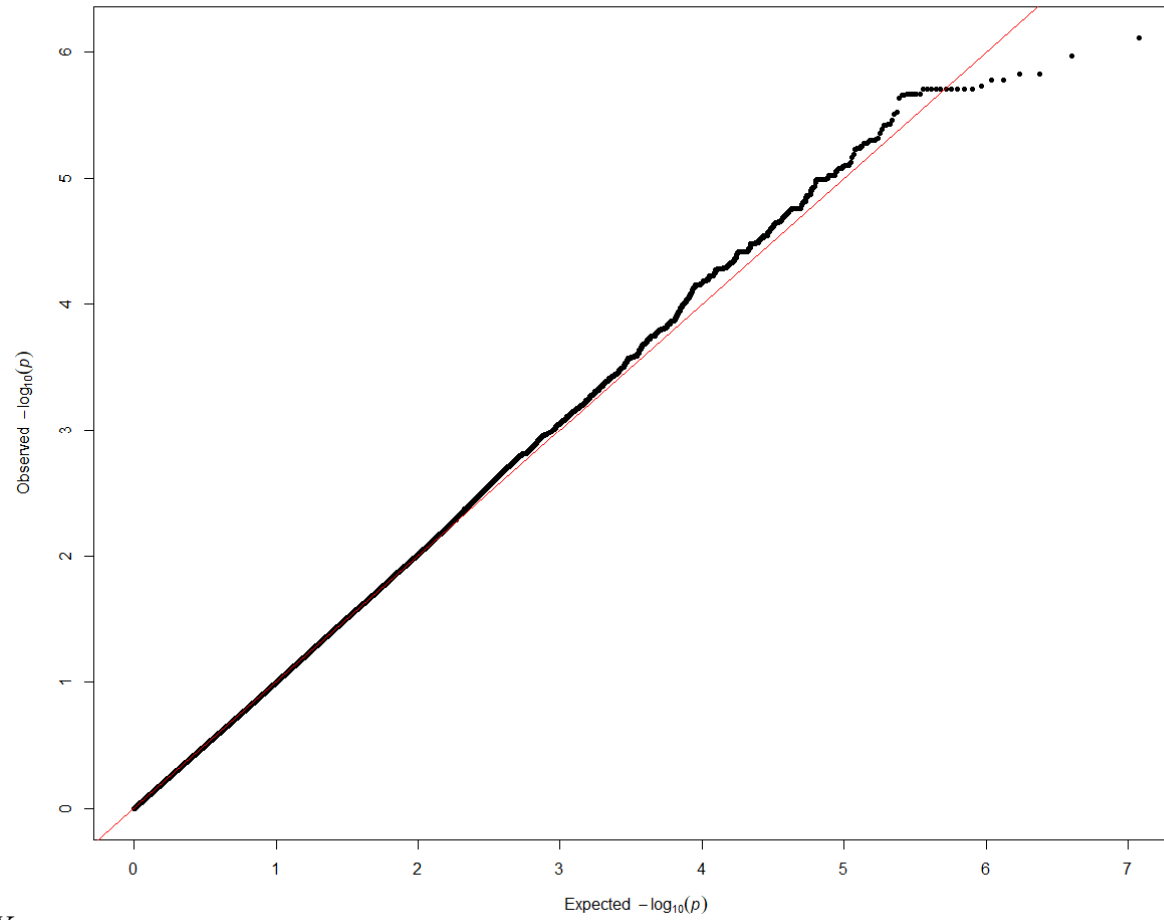

(b) HELIX



**Supplementary Table S3.** Gene mapping of selected results.

Gene mapping of LD clumped suggestive ( $p < 1 \times 10^{-5}$ ) variants. Automated mapping taken from FUMA SNP2Gene, and manually checked using dbSNP.

(a) ALSPAC

| SNP                                                                   | Chr | Position<br>(GRCH37) | Gene                | Distance to lead<br>SNP | Type                    |
|-----------------------------------------------------------------------|-----|----------------------|---------------------|-------------------------|-------------------------|
| rs4853739                                                             | 2   | 191698516            | <i>AC005540.3</i>   | 47006                   | intergenic              |
| rs11709754                                                            | 3   | 149615531            | <i>RNF13</i>        | 0                       | intronic                |
| rs361166                                                              | 4   | 152792791            | <i>GATB</i>         | 110632                  | Intergenic              |
| rs6859392                                                             | 5   | 63241481             | <i>RP11-158J3.2</i> | 12238                   | Intergenic <sup>1</sup> |
| rs1372504                                                             | 5   | 103749428            | <i>RP11-6N13.1</i>  | 0                       | ncRNA_intronic          |
| rs2246509                                                             | 6   | 156058999            | <i>RNU7-152P</i>    | 82838                   | intergenic              |
| rs1845418                                                             | 7   | 24095415             | <i>RNA5SP228</i>    | 76908                   | intergenic              |
| rs146099921                                                           | 8   | 22248665             | <i>SLC39A14</i>     | 0                       | intronic                |
| rs7900717                                                             | 10  | 122034207            | <i>RPL21P16</i>     | 79950                   | intergenic              |
| rs7301395                                                             | 12  | 116396301            | <i>MED13L</i>       | 0                       | downstream              |
| rs12874443                                                            | 13  | 38303606             | <i>TRPC4</i>        | 0                       | intronic                |
| rs113202356                                                           | 16  | 27891845             | <i>GSGIL</i>        | 0                       | intronic                |
| rs74450576                                                            | 16  | 73918519             | <i>RPSAP56</i>      | 56018                   | intergenic              |
| rs11643897                                                            | 16  | 78221370             | <i>WWOX</i>         | 0                       | intronic                |
| rs35522803                                                            | 19  | 3592133              | <i>GIPC3</i>        | 0                       | UTR3                    |
| rs60192794                                                            | 20  | 52317186             | <i>RNU7-14P</i>     | 31888                   | intergenic              |
| 1. In linkage disequilibrium with intronic variant within named gene. |     |                      |                     |                         |                         |

(b) HELIX

| SNP       | Chr | Position<br>(GRCH37) | Gene           | Distance | Type                    |
|-----------|-----|----------------------|----------------|----------|-------------------------|
| rs7526817 | 1   | 28195486             | <i>THEMIS2</i> | 3568     | Intergenic <sup>2</sup> |

|                                                                                       |    |           |                      |       |                         |
|---------------------------------------------------------------------------------------|----|-----------|----------------------|-------|-------------------------|
| rs79810835                                                                            | 1  | 146999434 | <i>LINC00624</i>     | 9734  | intergenic              |
| rs59436870                                                                            | 2  | 101830050 | <i>TBC1D8</i>        | 0     | intronic                |
| rs9852537                                                                             | 3  | 98658085  | <i>CTD-2021J15.1</i> | 0     | ncRNA_intronic          |
| rs186276942                                                                           | 3  | 115279279 | <i>GAP43</i>         | 62891 | intergenic              |
| rs62287513                                                                            | 3  | 184104050 | <i>CHRD</i>          | 0     | intronic                |
| rs28618224                                                                            | 4  | 21041710  | <i>KCNIP4</i>        | 0     | intronic                |
| rs115812569                                                                           | 4  | 42726300  | <i>ATP8A1</i>        | 67178 | intergenic              |
| rs2904271                                                                             | 4  | 90280428  | <i>GPRIN3</i>        | 53437 | intergenic              |
| rs113384484                                                                           | 5  | 151015719 | <i>CTB-113P19.4</i>  | 16116 | intergenic              |
| rs79340261                                                                            | 7  | 35559836  | <i>AC007652.1</i>    | 9962  | intergenic              |
| rs75847252                                                                            | 9  | 71483481  | <i>PIP5K1B</i>       | 0     | intronic                |
| rs73510541                                                                            | 11 | 69313573  | <i>AP000439.3</i>    | 18864 | Intergenic <sup>2</sup> |
| rs9510838                                                                             | 13 | 24300617  | <i>MIPEP</i>         | 3710  | Intergenic <sup>2</sup> |
| rs9563673                                                                             | 13 | 34236442  | <i>RP11-141M1.3</i>  | 0     | ncRNA_intronic          |
| rs17106291                                                                            | 14 | 37559401  | <i>SLC25A21</i>      | 0     | intronic                |
| rs7154700                                                                             | 14 | 63201771  | <i>KCNH5</i>         | 0     | Intronic <sup>1</sup>   |
| rs116971963                                                                           | 17 | 14961821  | <i>AC005772.2</i>    | 6227  | intergenic              |
| rs145982353                                                                           | 19 | 54257385  | <i>MIR527</i>        | 28    | downstream              |
| rs6075980                                                                             | 20 | 288233    | <i>ZCCHC3</i>        | 7267  | intergenic              |
| rs148653405                                                                           | 20 | 5594216   | <i>GPCPD1</i>        | 2543  | Upstream                |
| 1. In linkage disequilibrium ( $r^2 > 0.8$ ) with UTR3 variant within named gene.     |    |           |                      |       |                         |
| 2. In linkage disequilibrium ( $r^2 > 0.8$ ) with intronic variant within named gene. |    |           |                      |       |                         |

**Supplementary Table S4.** Functional analysis of selected results.

Summary of functional analysis for LD clumped suggestive ( $p < 1 \times 10^{-5}$ ) variants.

GWAS Catalog: No results for any SNPs.

(a) ALSPAC

| SNP        | SNP-based search                    |                                                       |                                             | Gene-based search (results for nearest gene unless otherwise stated) |                                                                       |                                      |                              |
|------------|-------------------------------------|-------------------------------------------------------|---------------------------------------------|----------------------------------------------------------------------|-----------------------------------------------------------------------|--------------------------------------|------------------------------|
|            | LDtrait<br>( $r^2 > 0.8$ )          | Phenoscaner ( $p < 5 \times 10^{-8}$ )                | eQTL                                        | Gene                                                                 | GeneCards                                                             | GTEx (blank: no notable variation)   | OMIM (human or animal cells) |
| rs4853739  | -                                   | <i>GLS</i> & <i>MFSD6</i> expression                  | <i>GLS</i> (-0.10, $7.22 \times 10^{-09}$ ) | <i>AC005540.3<sup>l</sup></i>                                        | Glutamine hydrolysis catalyst.<br><i>MFSD6</i> : MHC class 1 binding. |                                      | -                            |
| rs11709754 | -                                   | <i>PFN2</i> expression                                | <i>PFN2</i> (0.16, $4.10 \times 10^{-14}$ ) | <i>RNF13</i>                                                         | Protein-protein interactions, specifics unknown                       | Brain, whole blood                   | -                            |
| rs361166   | Trans fatty acid levels             | Histone modification, educational attainment          | -                                           | <i>GATB<sup>l</sup></i>                                              | Glutaminyl-tRNA synthetase, involved in glutamine transfer            | Brain, heart, skin                   | -                            |
| rs6859392  | -                                   | -                                                     | -                                           | <i>RP11-158J3.2<sup>2</sup></i>                                      | -                                                                     | Brain - hippocampus and front cortex | -                            |
| rs1372504  | Major depressive disorder, insomnia | Daytime napping, doctor visit for anxiety/depression. | -                                           | <i>RP11-6N13.1</i>                                                   | -                                                                     | Testis                               | -                            |
| rs2246509  | -                                   | -                                                     | -                                           | <i>RNU7-152P<sup>l</sup></i>                                         | -                                                                     | Brain - amygdala                     | -                            |
| rs1845418  | -                                   | -                                                     | -                                           | <i>RNA5SP228<sup>l</sup></i>                                         | -                                                                     | Kidneys                              | -                            |

|                                                                                                           |   |                         |                                                    |                             |                                                                       |                           |                                                         |
|-----------------------------------------------------------------------------------------------------------|---|-------------------------|----------------------------------------------------|-----------------------------|-----------------------------------------------------------------------|---------------------------|---------------------------------------------------------|
| rs146099921                                                                                               | - | -                       | <i>SLC39A14</i> (-0.16, 6.84 x 10 <sup>-09</sup> ) | <i>SLC39A14</i>             | Metal transporter, cellular uptake of cadmium, iron, manganese, zinc  | Arteries, liver, pancreas | Transport and homeostasis of zinc, manganese, and iron. |
| rs7900717                                                                                                 | - | -                       | -                                                  | <i>RPL21P16<sup>l</sup></i> | -                                                                     | -                         | -                                                       |
| rs7301395                                                                                                 | - | -                       | -                                                  | <i>MED13L</i>               | Mediator component between regulatory proteins and RNA transcription. | -                         | -                                                       |
| rs12874443                                                                                                | - | -                       | -                                                  | <i>TRPC4</i>                | Calcium ion channels                                                  | Arteries, uterus          | -                                                       |
| rs113202356                                                                                               | - | -                       | -                                                  | <i>GSG1L</i>                | Synapse receptor activity                                             | Arteries, brain           | -                                                       |
| rs74450576                                                                                                | - | -                       | -                                                  | <i>RPSAP56<sup>l</sup></i>  | -                                                                     | -                         | -                                                       |
| rs11643897                                                                                                | - | -                       | -                                                  | <i>WWOX</i>                 | Tumour suppression                                                    | -                         | -                                                       |
| rs35522803                                                                                                | - | <i>GIPC3</i> expression | -                                                  | <i>GIPC3</i>                | Hair bundle/cell maturation.                                          | -                         | -                                                       |
| rs60192794                                                                                                | - | -                       | -                                                  | <i>RNU7-14P<sup>l</sup></i> | -                                                                     | Testis                    | -                                                       |
| 1. Intergenic variant, gene listed is nearest.                                                            |   |                         |                                                    |                             |                                                                       |                           |                                                         |
| 2. Located outside of gene, and in linkage disequilibrium (r <sup>2</sup> >0.8) with variant within gene. |   |                         |                                                    |                             |                                                                       |                           |                                                         |

(b) HELIX

| SNP        | SNP-based search              |                                         |                                                 | Gene-based search (results for nearest gene unless otherwise stated) |                            |                                    |                              |
|------------|-------------------------------|-----------------------------------------|-------------------------------------------------|----------------------------------------------------------------------|----------------------------|------------------------------------|------------------------------|
|            | LDtrait (r <sup>2</sup> >0.8) | Phenoscaner (p < 5 x 10 <sup>-8</sup> ) | eQTL                                            | Gene                                                                 | GeneCards                  | GTEx (blank: no notable variation) | OMIM (human or animal cells) |
| rs7526817  | -                             | <i>RPA2</i> expression                  | <i>THEMIS2</i> (0.9, 6.10 x 10 <sup>-10</sup> ) | <i>THEMIS2<sup>2</sup></i>                                           | T cell receptor signalling | Whole blood                        | -                            |
| rs79810835 | -                             | <i>ACP6</i> expression                  |                                                 | <i>LINC00624<sup>l</sup></i>                                         | -                          | Testis                             | -                            |

|             |   |                                                |                                                 |                                 |                                                                                                                                                                                             |                               |   |
|-------------|---|------------------------------------------------|-------------------------------------------------|---------------------------------|---------------------------------------------------------------------------------------------------------------------------------------------------------------------------------------------|-------------------------------|---|
| rs59436870  | - | <i>SNORD89</i> expression                      | <i>RNF19</i> (0.57, 3.15 x 10 <sup>-28</sup> )  | <i>TBC1D8</i>                   | GTPase activator activity, predicted to be involved in intracellular protein transport<br><i>SNORD89</i> : ovarian cancer progression.<br><i>RNF19</i> : Ubiquitin ligase protein activity. | -                             | - |
| rs9852537   | - | Type 2 lactosamine alpha-2,3-sialyltransferase | -                                               | <i>CTD-2021J15.1</i>            | -                                                                                                                                                                                           | -                             | - |
| rs186276942 | - | -                                              | -                                               | <i>GAP43<sup>l</sup></i>        | Neuronal growth                                                                                                                                                                             | Brain, nerve                  | - |
| rs62287513  | - | -                                              | -                                               | <i>CHRD</i>                     | Early vertebrate embryonic development                                                                                                                                                      | Ubiquitous - high in brain    | - |
| rs28618224  | - | -                                              | -                                               | <i>KCNIP4</i>                   | Potassium voltage-gated channels                                                                                                                                                            | Brain                         | - |
| rs115812569 | - | -                                              | <i>ATP8A1</i> (0.34, 8.29 x 10 <sup>-08</sup> ) | <i>ATP8A1<sup>l</sup></i>       | Lipid (phospholipids) transport across membranes                                                                                                                                            | Brain, thyroid                | - |
| rs2904271   | - | -                                              | -                                               | <i>GPRIN3<sup>l</sup></i>       | Neuron development.                                                                                                                                                                         | Brain and lungs               | - |
| rs113384484 | - | <i>SPARC</i> expression                        | -                                               | <i>CTB-113P19.4<sup>l</sup></i> | Bone collagen calcification.                                                                                                                                                                | Oesophagus, skin, brain.      | - |
| rs79340261  | - | -                                              | -                                               | <i>AC007652.1<sup>l</sup></i>   | -                                                                                                                                                                                           | Testis                        | - |
| rs75847252  | - | <i>TJP2</i> expression.                        | -                                               | <i>PIP5K1B</i>                  | Regulation of lipid messenger.                                                                                                                                                              |                               | - |
| rs73510541  | - | -                                              | -                                               | <i>AP000439.3<sup>l</sup></i>   | -                                                                                                                                                                                           | Small intestines, colon, skin | - |

|             |   |                                    |   |                                |                                                                                                                                           |        |   |
|-------------|---|------------------------------------|---|--------------------------------|-------------------------------------------------------------------------------------------------------------------------------------------|--------|---|
| rs9510838   | - | -                                  | - | <i>MIPEP</i> <sup>1</sup>      | Maturation of oxidative phosphorylation-related proteins                                                                                  | -      | - |
| rs9563673   | - | -                                  | - | <i>RP11-141M1.3</i>            | -                                                                                                                                         | -      | - |
| rs17106291  | - | Treatment with antihypertensive    | - | <i>SLC25A21</i>                | Transports dicarboxylates across the inner membranes of mitochondria and participates in lysine, tryptophan, and hydroxylysine catabolism | Testis | - |
| rs7154700   | - | Cause of death: alcohol hepatitis. | - | <i>KCNH5</i>                   | Potassium voltage-gated channels                                                                                                          | Brain  | - |
| rs116971963 | - | -                                  | - | <i>AC005772.2</i> <sup>1</sup> | -                                                                                                                                         | Testis | - |
| rs145982353 | - | -                                  | - | <i>MIR527</i>                  | Micro RNA                                                                                                                                 | -      | - |
| rs6075980   | - | -                                  | - | <i>ZCCHC3</i> <sup>1</sup>     | DNA and RNA binding                                                                                                                       | -      | - |
| rs148653405 | - | -                                  | - | <i>GPCPDI</i> <sup>2</sup>     | Glycerophospholipid catabolic process                                                                                                     | -      | - |

1. Intergenic variant, gene listed is nearest.

2. Intergenic variant, and in linkage disequilibrium ( $r^2 > 0.8$ ) with variant within gene.
